# Supplementary material for: A facile acid treatment for P25 modification with enhanced photocatalytic H2 evolution – effect of Brønsted acid sites and oxygen vacancies
Source: Royal Society of Chemistry journal article supplement (doi:10.1039/c9cy02166c), 2019-12-16
Supplement: c9cy02166c1.pdf [file c9cy02166c1.pdf]

## Supporting Information for

### **A facile acid treatment for P25 modification with enhanced Photocatalytic H<sub>2</sub> evolution -- Effect of Brønsted acid sites and oxygen vacancies**

Chao Lv, Xuefang Lan, Fuqiang Li, Lili Wang, Liqi Xiao, Cheng Wang, Jinsheng Shi  
and Shuguang Yu\*

*Qingdao Agricultural University, Department of Chemistry and Pharmaceutical Science,  
China*

*\* Corresponding author at: Qingdao Agricultural University, Department of Chemistry and  
Pharmaceutical Science, Chengyang District, Qingdao, China E-mail address:  
jsshqn@aliyun.com.*

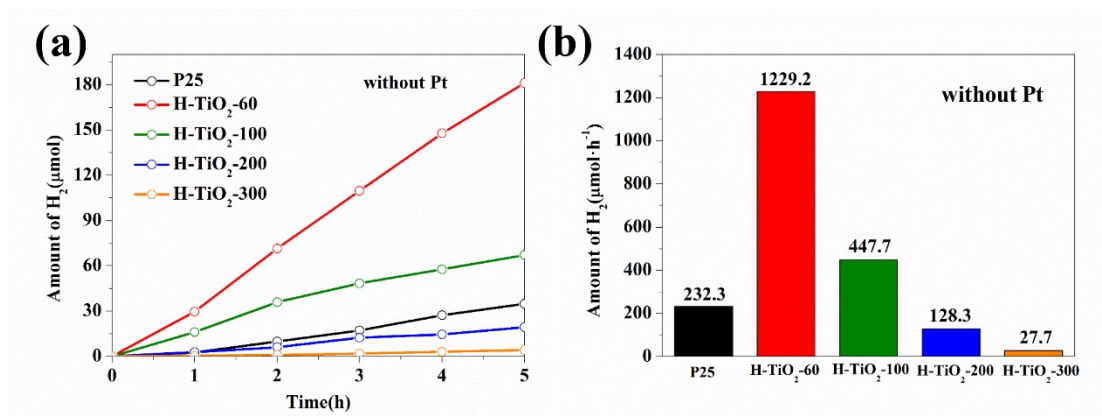

**Fig. S1.** Photocatalytic capacity for the H<sub>2</sub> production from water splitting over P25 and HP25-x (x = 60, 100, 200 and 300) under the conditions without co-catalyst.

Table S1

The calculation of energy band structure related parameters of P25 and HP25-x (x = 60, 100, 200 and 300).

| catalysis | $E_{CB}$ (V vs NHE) | Band gap energy | $E_{VB}$ (V vs NHE) |
|-----------|---------------------|-----------------|---------------------|
| P25       | -0.01               | 3.15 eV         | 3.14                |
| HP25-60   | -0.11               | 3.10 eV         | 2.99                |
| HP25-100  | -0.01               | 3.07 eV         | 3.06                |
| HP25-200  | -0.01               | 3.11 eV         | 3.10                |
| HP25-300  | -0.11               | 3.11 eV         | 3.00                |
